# Supplementary material for: Catalytical feature of optical nanoprobes of boron nitride quantum dots in the presence of Cu2+ for the determination of dopamine
Source: Royal Society of Chemistry journal article supplement (doi:10.1039/d1an00768h), 2021-01-01
Supplement: d1an00768h1.pdf [file d1an00768h1.pdf]

**Catalytical feature from optical nanoprobe of boron nitride quantum dots in the presence of Cu<sup>2+</sup> for the determination of dopamine**

Xiushuang Fan<sup>a, b, c</sup>, Jinpeng Qiu<sup>b</sup>, Chao Peng<sup>c</sup>, Jiangtao Ren<sup>c</sup>, Huanhuan Xing<sup>c</sup>, Chuyao Bi<sup>a</sup>, Jianyuan Yin<sup>\*a</sup> and Jing Li<sup>\*c</sup>

<sup>a</sup> School of Pharmaceutical Sciences, Jilin University, Changchun, Jilin, 130021, China.

E-mail: [yinjy@jlu.edu.cn](mailto:yinjy@jlu.edu.cn)

<sup>b</sup> Department of Anesthesiology, The First Hospital of Jilin University, Changchun, Jilin, 130021, China.

<sup>c</sup> State Key Laboratory of Electroanalytical Chemistry, Changchun Institute of Applied Chemistry, Chinese Academy of Sciences, Changchun, Jilin, 130022, China.

E-mail: [lijingce@ciac.ac.cn](mailto:lijingce@ciac.ac.cn)

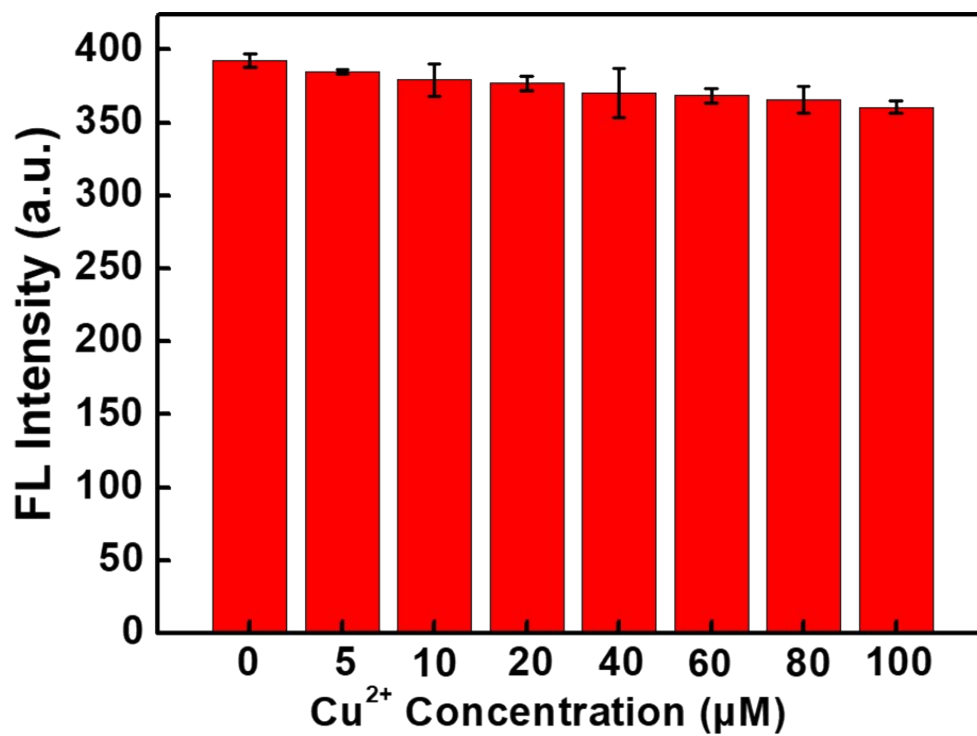

Figure S1. FL intensity of BNQDs excited at 310 nm in the presence of different concentrations of Cu<sup>2+</sup> from 0 to 100µM.

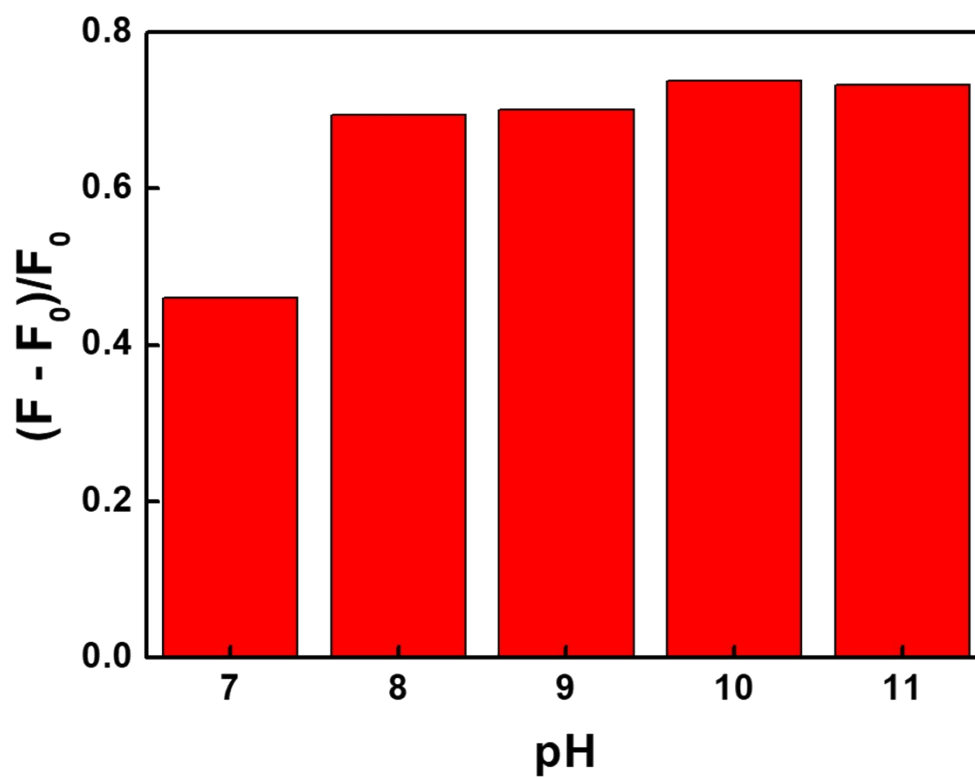

Figure S2. The effect of pH on the fluorescence intensity of the sensing system.

| Determination method | Materials                          | LOD ( $\mu\text{M}$ ) | Reference |
|----------------------|------------------------------------|-----------------------|-----------|
| colorimetry          | N-B CQDs                           | 3.312                 | 1         |
| colorimetry          | Ag@PDBA-DSP                        | 6.47                  | 2         |
| Electrochemistry     | 2D Hexagonal boron nitride         | 0.65                  | 3         |
| Electrochemistry     | Hierarchical nanoporous PtTi alloy | 3.2                   | 4         |
| Fluorescence         | C3N4                               | 0.03                  | 5         |
| Fluorescence         | CuInS2                             | 0.2                   | 6         |
| Fluorescence         | CQDs                               | 200                   | 7         |
| Fluorescence         | Pdots@AMP-Cu                       | 4                     | 8         |
| Fluorescence         | BNQDs                              | 0.49                  | This work |

Table S1. Comparison of different methods for DA determination.

### References

1. S. Dadkhah, A. Mehdinia, A. Jabbari and A. Manbohi, *Microchim. Acta*, 2020, **187**, 569.
2. S. Palanisamy, X.H. Zhang and T. He, *Sci. China Chem.*, 2016, **59**, 387-393.
3. A.F. Khan, D.A.C. Brownson, E.P. Randviir, G.C. Smith and C.E. Banks, *Anal. Chem.*, 2016, **88**, 9729-9737
4. D.Y. Zhao, G.L. Yu, K.L. Tian and C.X. Xu, *Biosens. Bioelectron.*, 2016, **82**, 119-126.
5. H. Li, M.M. Yang, J. Liu, Y.L. Zhang, Y.M. Yang, H. Huang, Y. Liu, Z.H. Kang, *Nanoscale*, 2015, **7**, 12068-12075.
6. S.Y. Liu, F.P. Shi, X.J. Zhao, L. Chen and X.G. Su, *Biosens. Bioelectron.*, 2013, **47**, 379-384.
7. D. Bharathi, B. Siddlingeshwar, R.H. Krishna, V. Singh, N. Kottam, D.D. Divakar and A.A. Alkheraif, *J. Fluoresc.*, 2018, **28**, 573-579.
8. H. Huang, J. Bai, J. Li, L.L. Lei, W.J. Zhang, S.J. Yan and Y.X. Li, *Anal. Bioanal. Chem.*, 2020, **412**, 5291-5297.
